# Supplementary material
Source: publisher figshare collection journal article supplement (https://gsajournals.figshare.com/articles/dataset/_/5952370)
Supplement: Supplementary file 2 [file 1]

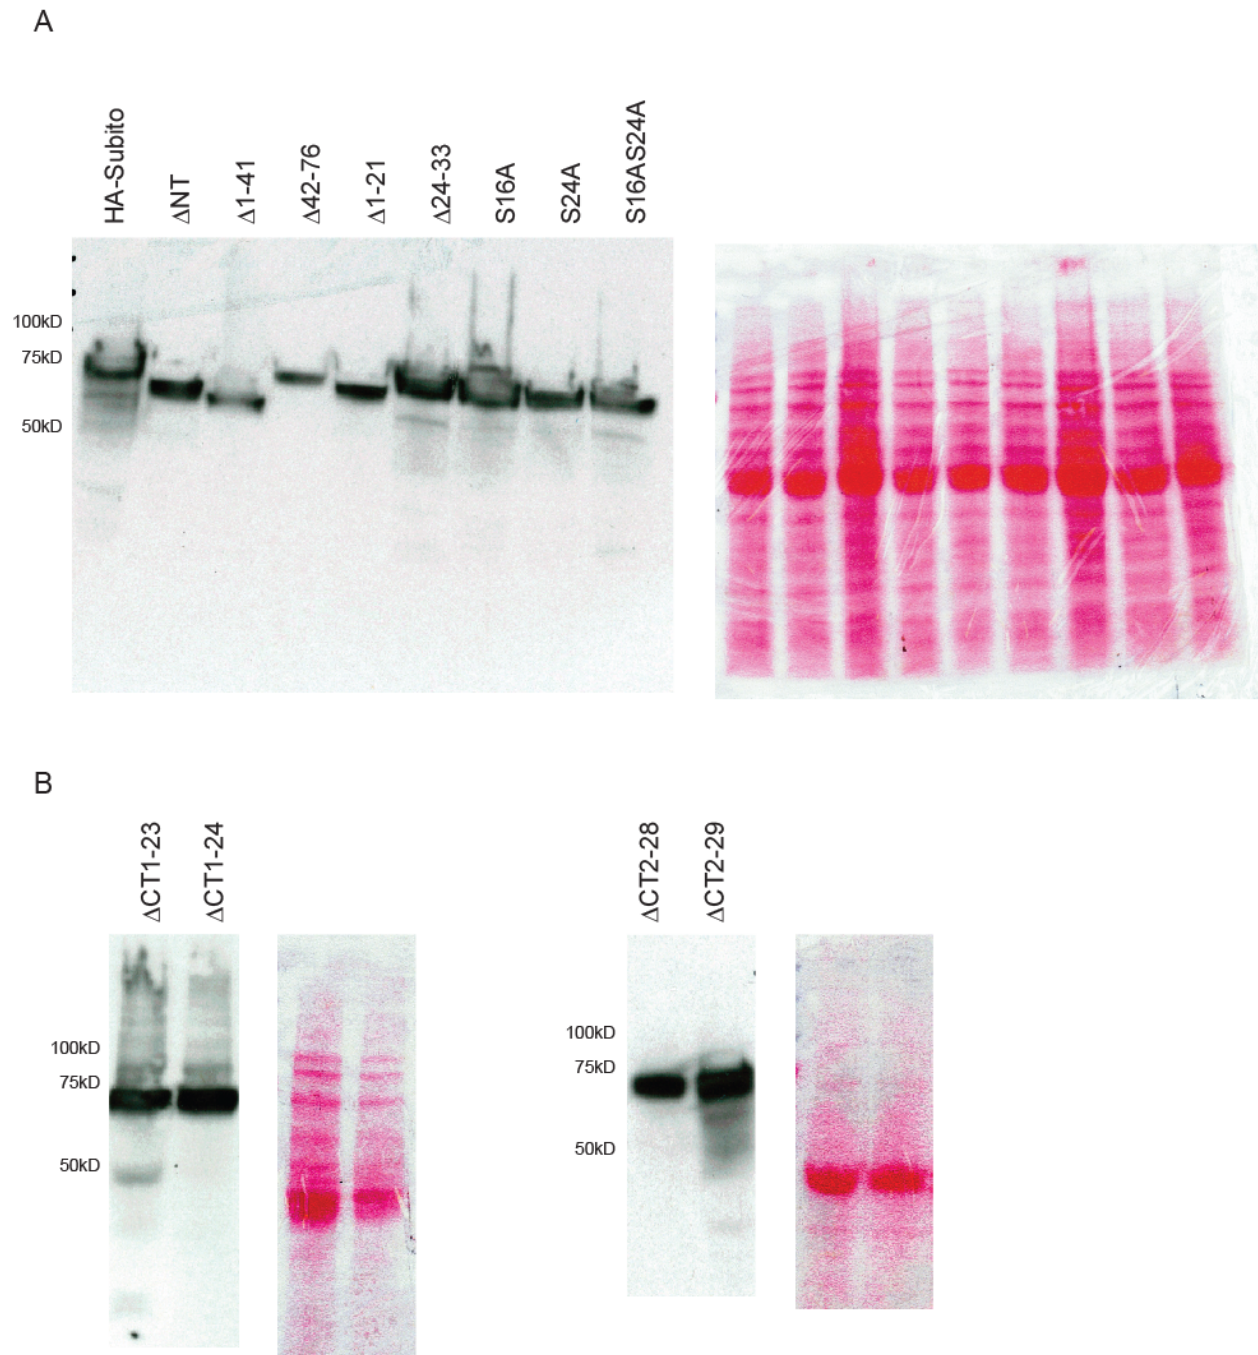

**Figure S 3: Expression of *subito* mutants.**

Comparison of Subito expression from HA tagged transgenes. Subito tagged with HA under the control of UASP was expressed using  $P\{GAL4::VP16-nos.UTR\}MVD1$ . Protein from approximately 3-4 ovaries was loaded on a gel and Subito was detected using an anti-rat HA antibody. The ponceau stained membrane serve as loading control.
