# Supplementary material
Source: publisher figshare collection journal article supplement (https://gsajournals.figshare.com/articles/dataset/_/5952370)
Supplement: Supplementary file 3 [file 1]

**Table S 1: Fertility and non-disjunction phenotypes of *subito* mutants in a wild type background**

| Transgene <sup>1</sup>         | Nondisjunction progeny | Total progeny | Progeny/female parent | % Non-Disjunction |
|--------------------------------|------------------------|---------------|-----------------------|-------------------|
| <i>sub</i> <sup>HA</sup>       | 0                      | 1514          | 76                    | 0                 |
| <i>sub</i> <sup>ΔNT</sup>      | 1                      | 869           | 43                    | 0.23              |
| <i>sub</i> <sup>Δ(1-41)</sup>  | 0                      | 1412          | 24                    | 0.3               |
| <i>sub</i> <sup>Δ(1-21)</sup>  | 0                      | 1889          | 47                    | 0                 |
| <i>sub</i> <sup>Δ(24-33)</sup> | 1                      | 2581          | 54                    | 0.08              |
| <i>sub</i> <sup>S16AS24A</sup> | 0                      | 1219          | 38                    | 0                 |
| <i>sub</i> <sup>Δ(42-76)</sup> | 11                     | 4251          | 36                    | 0.52              |
| <i>sub</i> <sup>ΔCT1</sup>     | 0                      | 1632          | 40                    | 0                 |
| <i>sub</i> <sup>ΔCT2</sup>     | 2                      | 1531          | 32                    | 0.26              |

<sup>1</sup>Each transgene was expressed in the presence of wild-type endogenous Subito protein and resultant progeny was tested for fertility and X-chromosome non-disjunction.

**Table S 2: Percentage of oocytes in each spindle category.**

| <b>Transgenes expressed</b>                                 | <b>Bipolar WT</b> | <b>Bipolar Frayed</b> | <b>Bipolar no CS</b> | <b>Multipolar</b> | <b>Monopolar</b> | <b>Other</b> |
|-------------------------------------------------------------|-------------------|-----------------------|----------------------|-------------------|------------------|--------------|
| <i>sub</i> <sup>1/131</sup> ; <i>sub</i> <sup>HA</sup>      | 52                | 36                    | 0                    | 0                 | 0                | 12           |
| <i>sub</i> <sup>+</sup> ; <i>sub</i> <sup>Δ(1-41)</sup>     | 54                | 36                    | 0                    | 0                 | 0                | 9            |
| <i>sub</i> <sup>+</sup> ; <i>sub</i> <sup>ΔCT1</sup>        | 41.6              | 50                    | 0                    | 0                 | 0                | 8.3          |
| <i>sub</i> <sup>+</sup> ; <i>sub</i> <sup>ΔCT2</sup>        | 100               | 0                     | 0                    | 0                 | 0                | 0            |
| <i>sub</i> <sup>+</sup> ; <i>sub</i> <sup>3A</sup>          | 71.4              | 28.6                  | 0                    | 0                 | 0                | 0            |
| <i>sub</i> <sup>1/131</sup>                                 | 0                 | 26.6                  | 30                   | 30                | 3.33             | 10           |
| <i>sub</i> <sup>1/131</sup> ; <i>sub</i> <sup>Δ(1-41)</sup> | 20                | 20                    | 10                   | 30                | 10               | 10           |
| <i>sub</i> <sup>1/131</sup> ; <i>sub</i> <sup>ΔCT1</sup>    | 0                 | 28.6                  | 0                    | 0                 | 57.1             | 14.3         |
| <i>sub</i> <sup>1/131</sup> ; <i>sub</i> <sup>ΔCT2</sup>    | 16                | 0                     | 0                    | 16                | 32               | 36           |
| <i>sub</i> <sup>1/131</sup> ; <i>sub</i> <sup>3A</sup>      | 53                | 35                    | 6                    | 6                 | 0                | 0            |
| <i>sub</i> <sup>1/131</sup> ; <i>sub</i> <sup>3E</sup>      | 33.4              | 20                    | 13.3                 | 6.7               | 13.3             | 13.3         |
