# Supplementary material
Source: publisher figshare collection journal article supplement (https://gsajournals.figshare.com/articles/dataset/_/5952370)
Supplement: Supplementary file 4 [file 1]

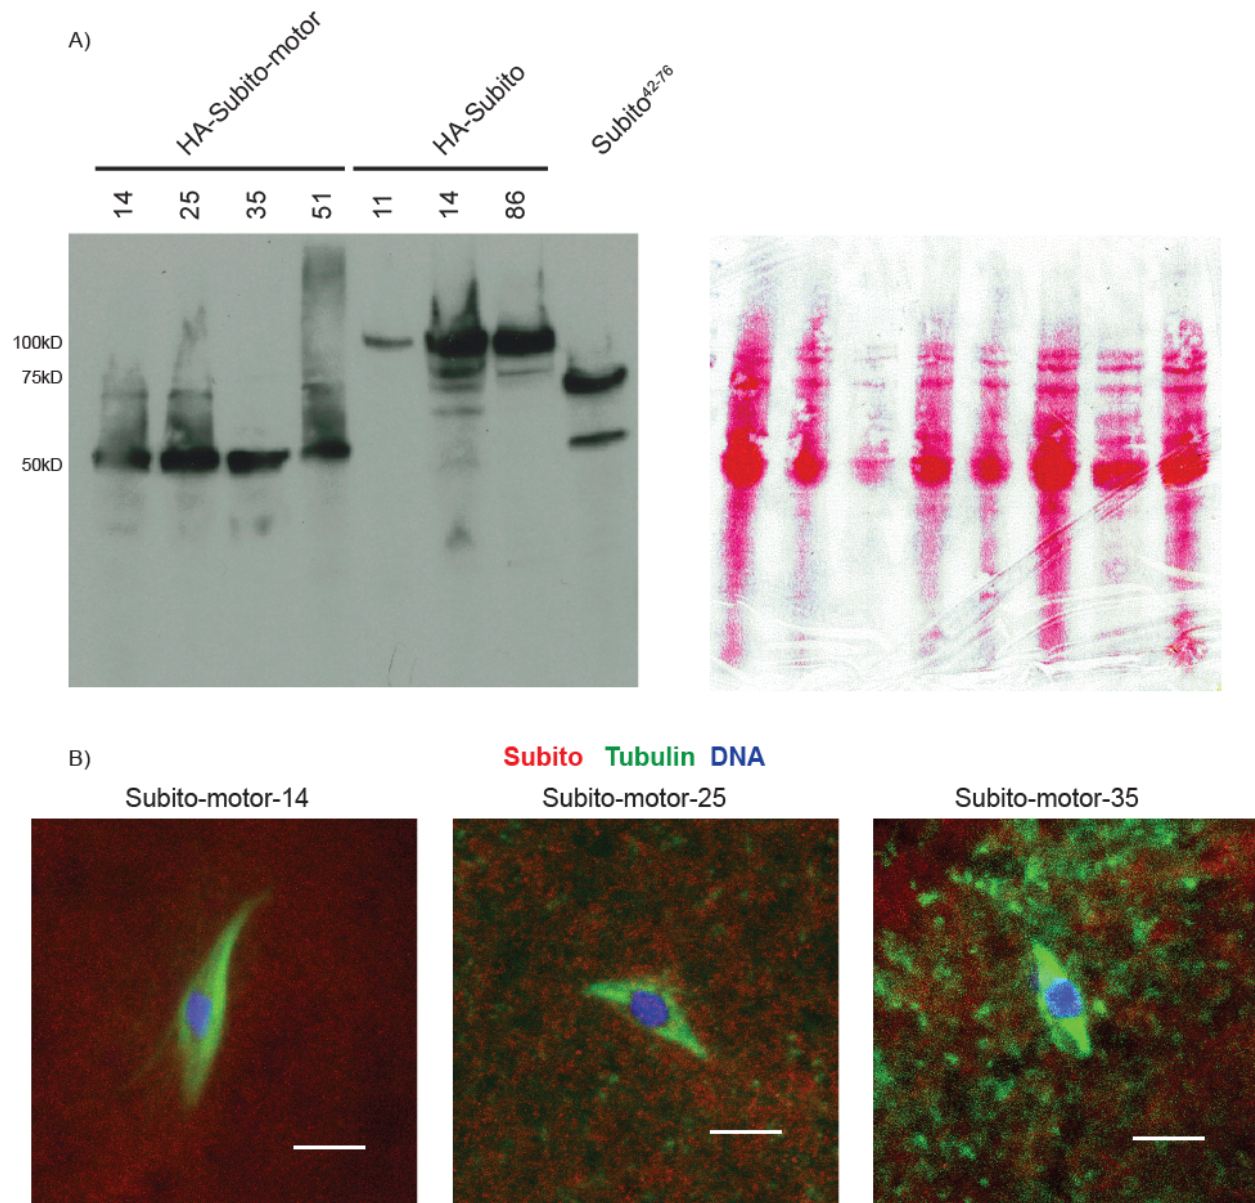

**Figure S 5: Subito motor domain expression and localization.**

A. Comparison of Subito expression from HA tagged transgenes. Full length Subito or a motor-only construct tagged with HA and under the control of UASP were expressed using *P{GAL4::VP16-nos.UTR}MVD1* and was detected using an anti-rat HA antibody. The ponceau stained membrane serve as loading control. B. Examples of oocytes expressing Subito motor only constructs from three independent transgenic lines in a wild-type Subito background. Oocytes stained for DNA (blue), HA (red) and tubulin (green). Scale bars are 5µm.
