# Supplementary material
Source: publisher figshare collection journal article supplement (https://gsajournals.figshare.com/articles/dataset/_/5952370)
Supplement: Supplementary file 5 [file 1]

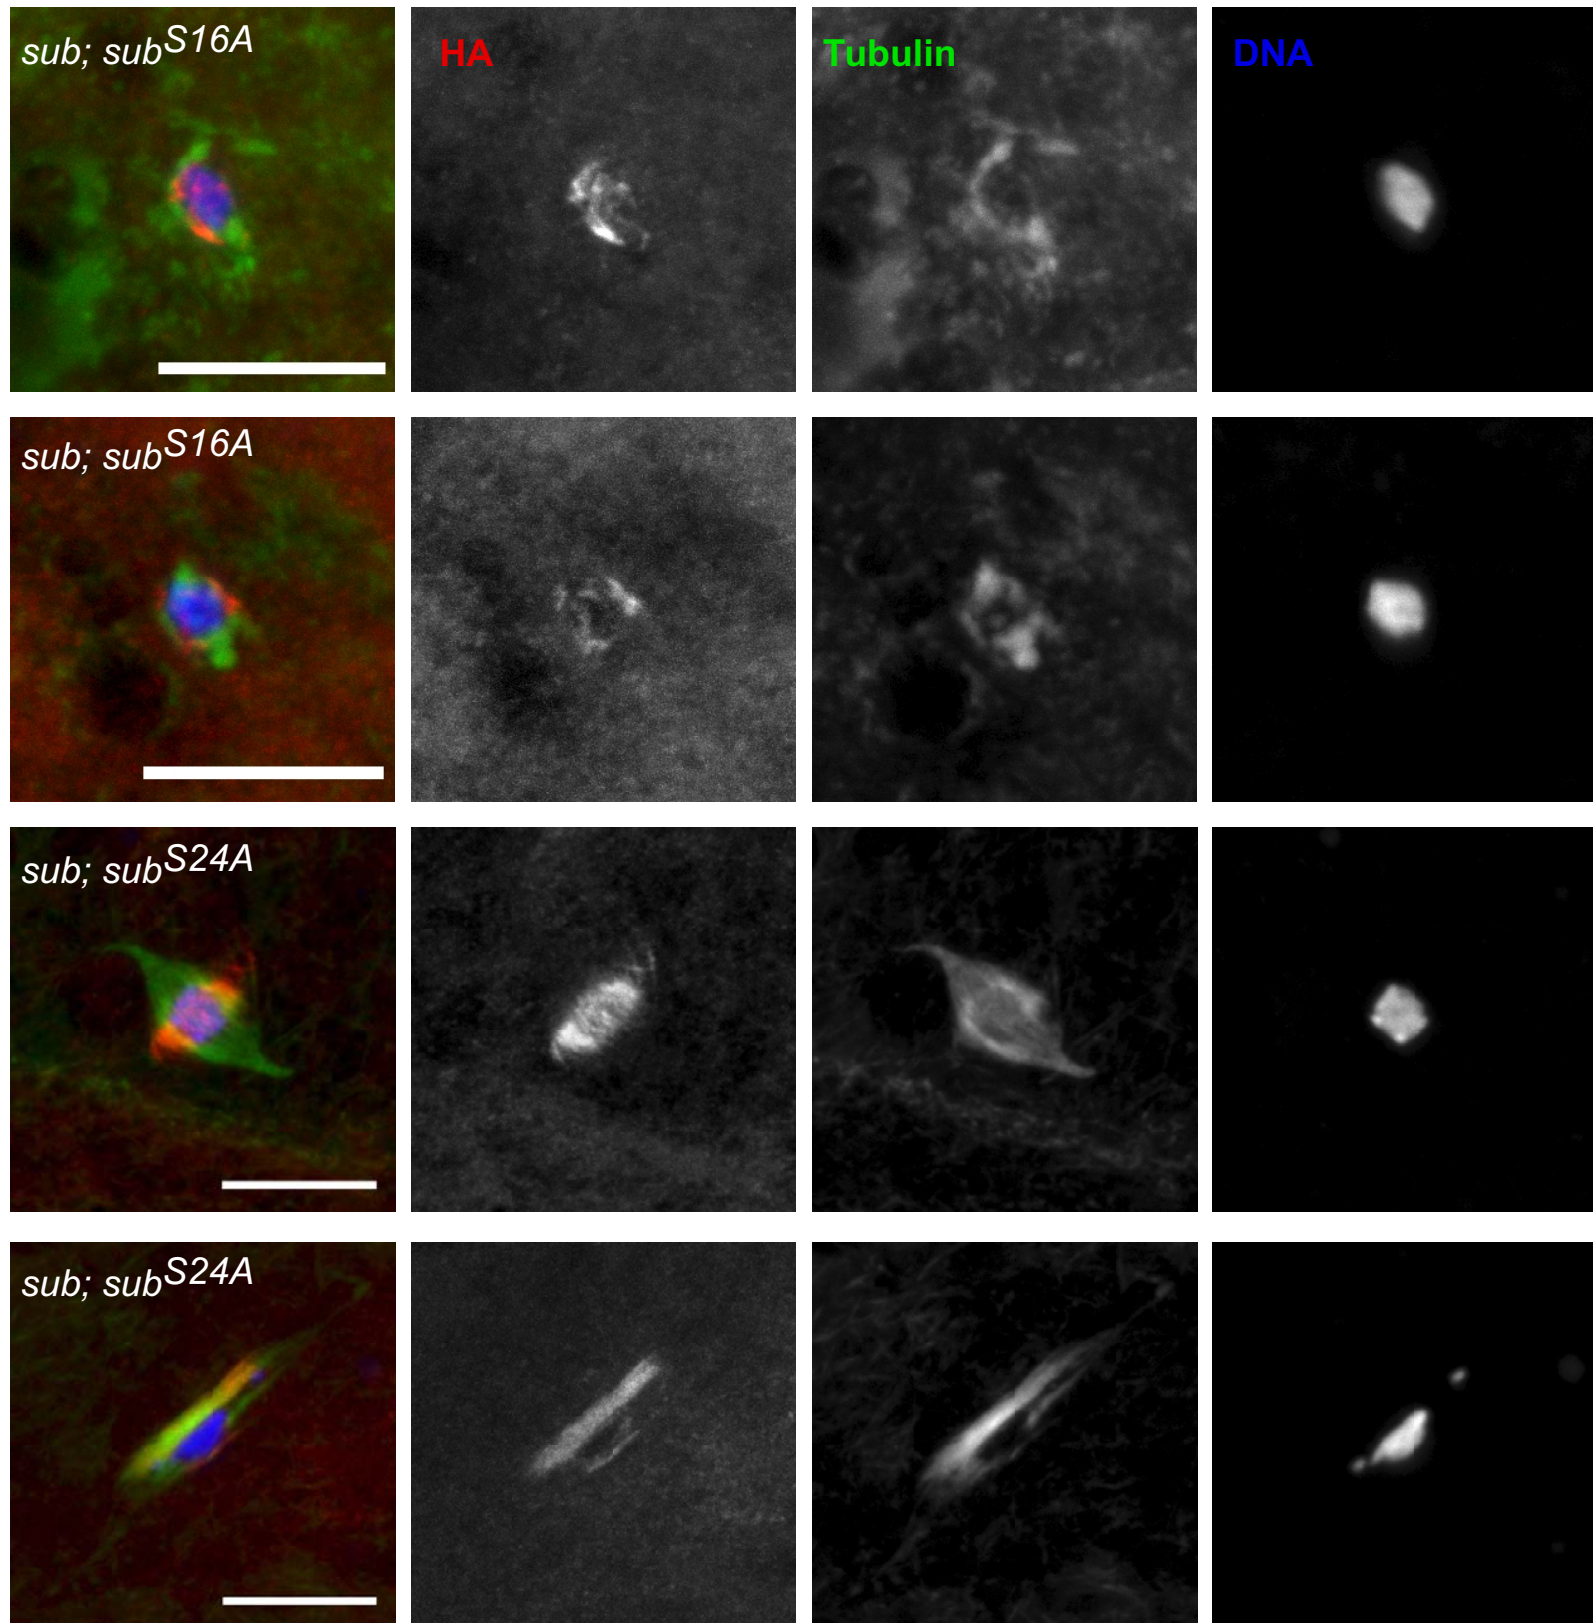

Figure S 4: Localization of S16A and S24A.

Examples of oocytes expressing Subito<sup>S16A</sup> or Subito<sup>S24A</sup> in a *sub<sup>131/1</sup>* background. Oocytes stained for DNA (blue), INCENP or HA (red), tubulin (green). The single channel images are for INCENP, HA and tubulin are shown in white. Scale bars are 5µm.
