# Supplementary material
Source: publisher figshare collection journal article supplement (https://gsajournals.figshare.com/articles/dataset/_/5952370)
Supplement: Supplementary file 6 [file 1]

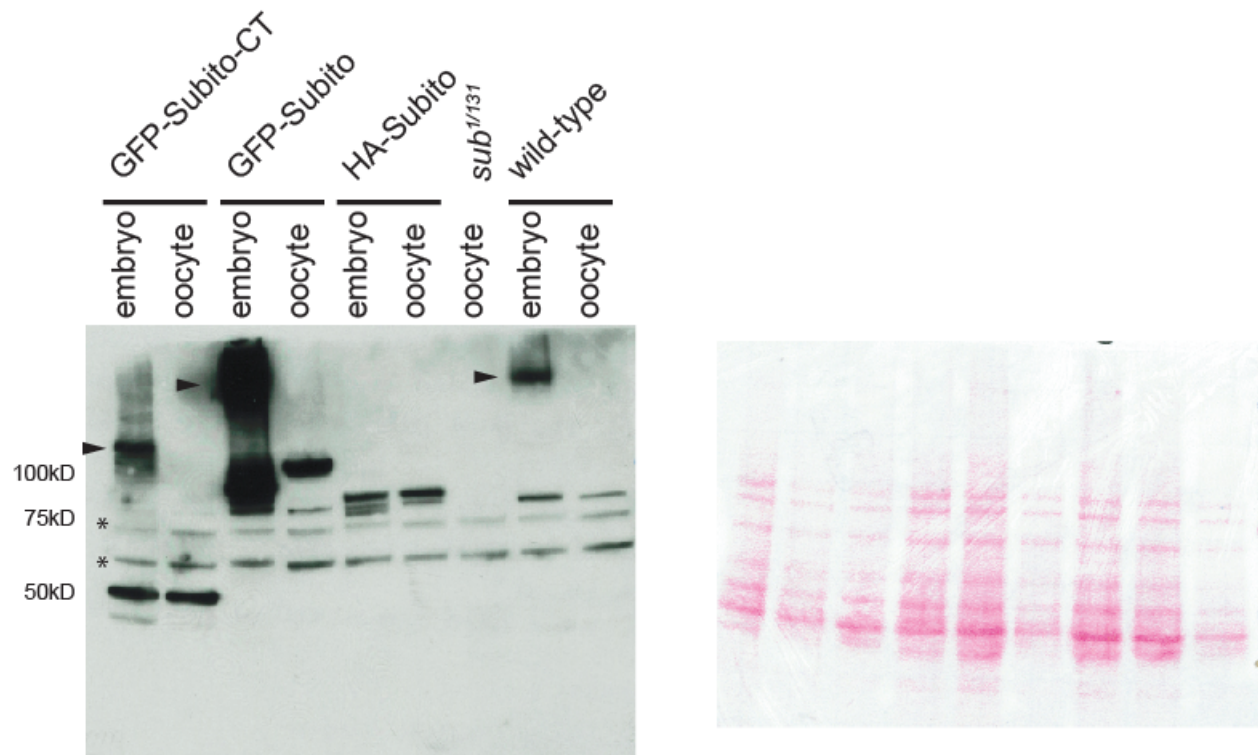

### Figure S 1: Western blot analysis

Comparison of Subito expression from GFP and HA tagged transgenes. Subito tagged with either GFP or HA under the control of UASP were expressed using *P{GAL4::VP16-nos.UTR}MVD1*. All constructs are full length except “CT”, which is only the C-terminal domain. Protein from approximately 2-3 ovaries was loaded on a gel and Subito was detected using an anti-rat polyclonal antibody that recognizes the C-terminal domain of Subito. Bands shown with an arrow head are evidence of dimer formation and is usually observed in the embryo samples. The CT fragment shows a lower sized dimer band relative to full length proteins, suggesting dimer formation involves the C-terminal domain. The presence of such a band in wild-type ovaries shows this is not due to the GFP tag. The *sub<sup>1/131</sup>* lane is from a female that makes no Subito protein. The two non-specific bands (asterisk) between 50 and 75kD as well as the ponceau stained membrane serve as loading controls. Oocytes typically lack the larger bands representing dimers.
